# Supplementary material for: The Influence of Long and Short Cycle Schemes of Self-Cycling Fermentation on the Growth of E. Coli and S. Cerevisiae
Source: Research Square preprint supplement (doi:10.21203/rs.3.rs-1139754/v1), 2021-12-13
Supplement: Supplementary file 1 [file 0b31c06da366035cbb5b93ba.docx]

# Supporting Information


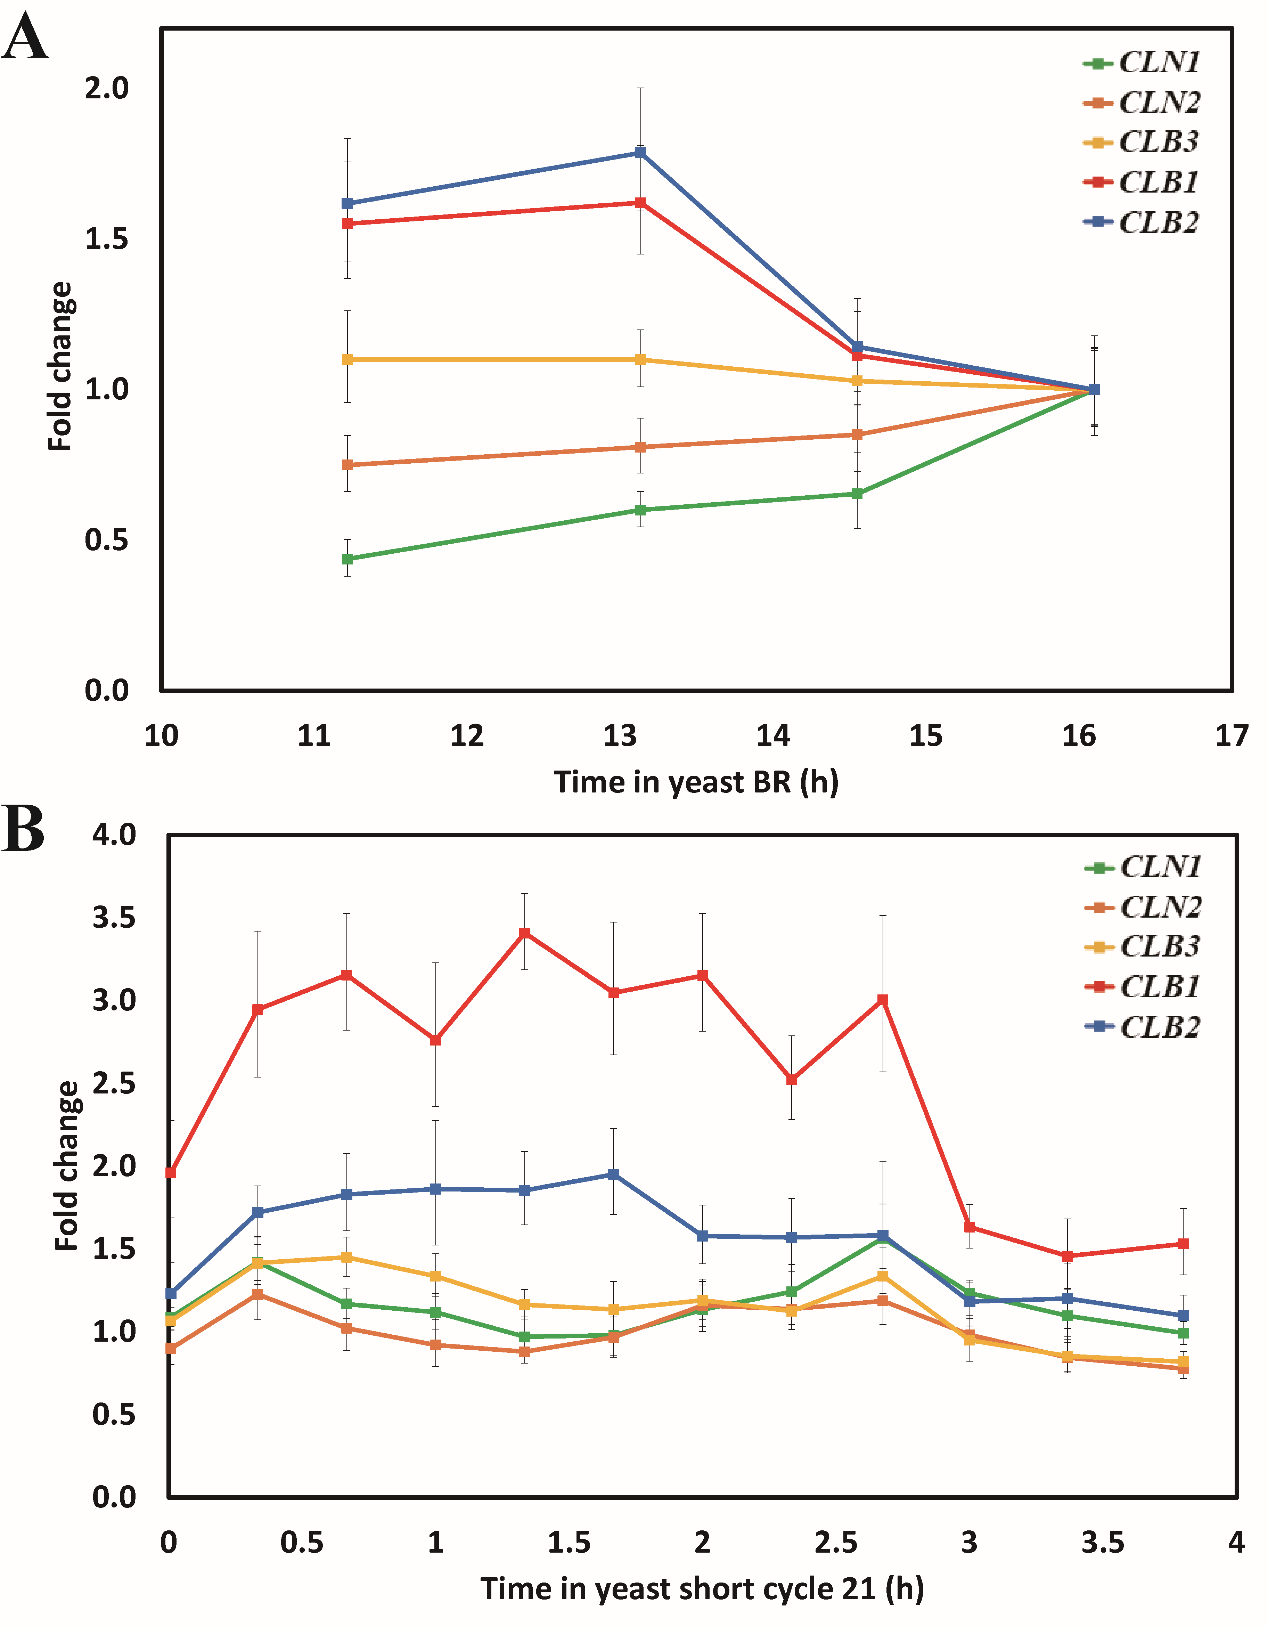


**Fig. S1** Relative expression levels of selected *S. cerevisiae* cyclin genes in replicated experiments. **A** fold changes of *CLN1*, *CLN2*, *CLB3*, *CLB1,* and *CLB2* during BR late-log phase. **B** fold changes of the same cycling genes during SCF short cycle 21. *ACT1* and *ALG9* were used as reference genes, and a sample collected at 16.2 h during BR was used as the reference sample. Error bars show one standard deviations (n = 3).


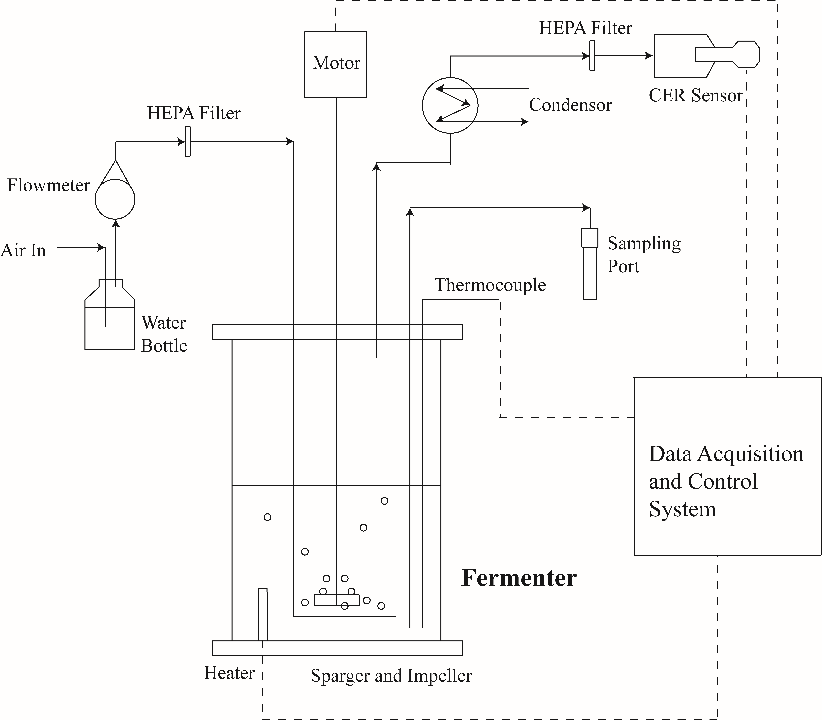


**Fig. S2**  Schematic of the batch reactor configuration used for this study.
